# Supplementary material for: Root type matters: measurement of water uptake by seminal, crown, and lateral roots in maize
Source: PubMed Central journal article supplement (PMC6019006; doi:10.1093/jxb/erx439), 2018-01-03
Supplement: erx439_suppl_supplementary_figure_s1.pdf [file erx439_suppl_supplementary_figure_s1.pdf]

## Supplementary data

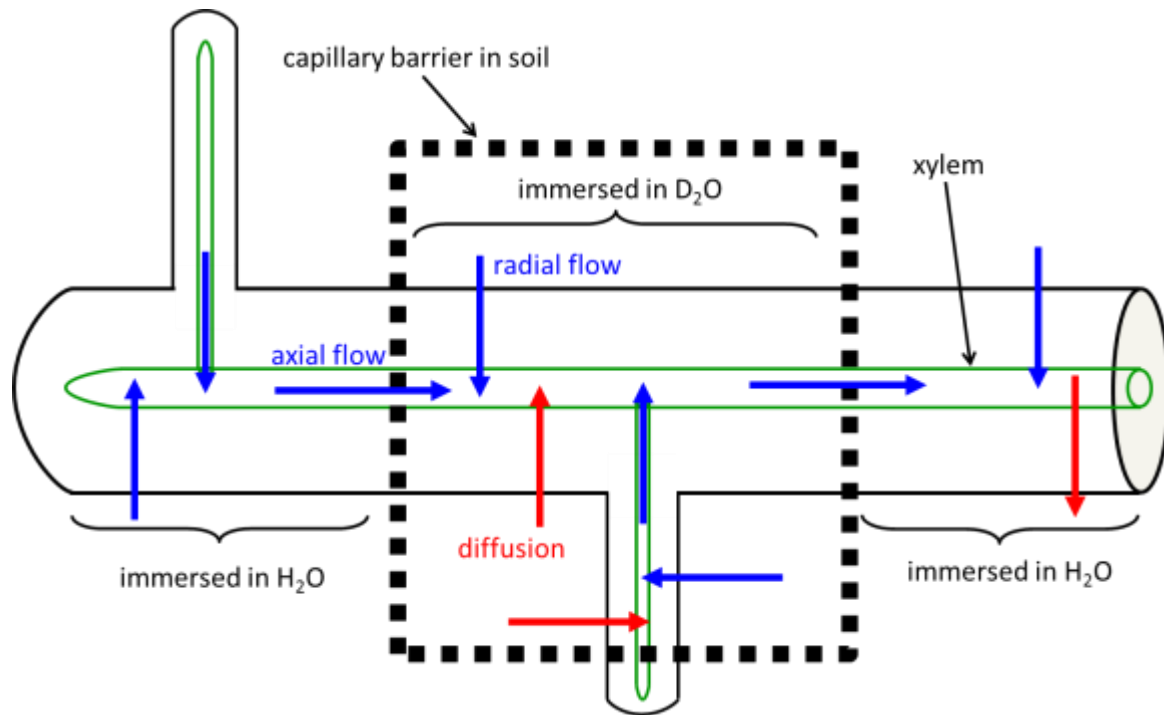

**Fig. S1.** Illustration of deuterated water ( $D_2O$ ) transport into a root that is partially immersed in  $D_2O$ . The radial transport of  $D_2O$  into the root is driven by the concentration gradients between the soil and roots (diffusion, red arrows) and by convection following the transpiration stream (blue arrows). As  $D_2O$  reaches the xylem, it mixes with the incoming water flow and flows axially along the root. The capillary barriers were used to limit  $D_2O$  diffusion in soil.
